# Supplementary material for: Controlling nonspecific trypsin cleavages in LC-MS/MS-based shotgun proteomics using optimized experimental conditions
Source: Royal Society of Chemistry journal article supplement (doi:10.1039/c5an01505g), 2015-01-01
Supplement: c5an01505g1.xlsx [file c5an01505g1.xlsx]

## Sheet: Sheet2
Supplementary table 3: Percentages of partially trptic peptides from all digests in this study
			Total sequences		Partially tryptic sequences		Ratio of partially tryptic sequences		Avarage		Missed cleavage			Number of MS/MS spectra	Spectrum identification rate
		Replicate	Unique peptides	Spectra	Unique peptides	Spectra	Unique peptides	Spectra	Unique peptides	Spectra	No.	Ratio	Avarage
Samples						12399
standard protein mixture		1	388	2253	184	967	0.474227	0.429206	0.472531	0.411032
		2	278	2681	136	1038	0.489209	0.387169
		3	469	1483	213	618	0.454158	0.416723
Yeast		1	732	1413	136	251	0.185792	0.177636	0.187082	0.169377
		2	1936	3912	380	672	0.196281	0.171779
		3	2199	4612	394	732	0.179172	0.158716
Cancer cell lines		1	3709	5928	200	267	0.0539229	0.0450405	0.0673788	0.0602775
		2	4589	5684	350	399	0.0762693	0.070197
		3	4295	5412	309	355	0.0719441	0.065595
Human serum		1	1604	2675	331	407	0.206359	0.15215	0.198728	0.139279
		2	1534	2876	299	381	0.194915	0.132476
		3	1493	2770	291	369	0.19491	0.133213
Mouse brain		1	5285	6069	280	292	0.0529801	0.0481134	0.055129	0.0500991
		2	5360	6237	295	308	0.0550373	0.0493827
		3	5543	6515	318	344	0.0573697	0.0528012
Denaturing agents and storage time
Denaturing agents	Time/month
SDS	0	1	2692	4126	83	105	0.0308321	0.0254484	0.0348941	0.0291551	595	0.221025	0.265538	11829	0.227576
		2	3073	4472	125	153	0.0406769	0.0342129			1023	0.332899		12709	0.241797
		3	2291	3165	76	88	0.0331733	0.0278041			556	0.242689		9329	0.245578
	7	1	3652	4373	115	125	0.0314896	0.0285845	0.03573	0.029409	1015	0.27793	0.315449	14206	0.257074
		2	3198	4581	133	152	0.0415885	0.0331805			1055	0.329894		13249	0.241377
		3	2697	4497	92	119	0.034112	0.0264621			913	0.338524		11542	0.233668
Urea	0	1	2768	4269	128	158	0.0462428	0.037011	0.0510469	0.0436958	339	0.122471	0.150912	11618	0.238251
		2	3714	5422	201	244	0.0541195	0.0450018			713	0.191976		13307	0.279101
		3	3941	4809	208	236	0.0527785	0.0490747			545	0.13829		13080	0.3013
	7	1	3331	4763	218	273	0.0654458	0.0573168	0.0776133	0.0653177	415	0.124587	0.139482	12534	0.265757
		2	3934	5617	360	425	0.0915099	0.0756632			530	0.134723		13643	0.288353
		3	4072	5812	309	366	0.0758841	0.0629732			648	0.159136		13891	0.293139
Trypsin type
Description	Tryspin
Sequencing grade modified trypsin	1	1	4335	5985	207	226	0.0477509	0.0377611	0.0455508	0.0360819	618	0.142561	0.133978	12852	0.337302
		2	4298	5840	200	217	0.0465333	0.0371575			586	0.136342		12761	0.336807
		3	3682	5281	156	176	0.0423683	0.033327			453	0.123031		12523	0.294019
Mass spectrometry grade modified trypsin	2	1	4184	6247	150	166	0.0358509	0.0265728	0.0326155	0.0237044	870	0.207935	0.207842	13200	0.31697
		2	3756	5875	122	139	0.0324814	0.0236596			789	0.210064		12996	0.289012
		3	3727	5699	110	119	0.0295144	0.0208809			766	0.205527		12959	0.287599
Unmodified trypsin	3	1	4023	5575	222	248	0.0551827	0.0444843	0.0559664	0.0452101	1193	0.296545	0.29831	12921	0.311354
		2	3751	5352	204	239	0.0543855	0.0446562			1108	0.295388		12859	0.291702
		3	3703	5356	216	249	0.0583311	0.0464899			1122	0.302998		12746	0.290523
Enzyme-to-substrate ratio
1：5		1	4610	6331	503	607	0.109111	0.0958774	0.109256	0.0945905	529	0.114751	0.114178	13106	0.351747
		2	4521	6312	490	590	0.108383	0.0934728			527	0.116567		12868	0.351337
		3	4253	6005	469	567	0.110275	0.0944213			473	0.111216		12870	0.330458
1：20		1	4445	6408	242	279	0.0544432	0.0435393	0.0543565	0.0429131	653	0.146907	0.148756	13239	0.33575
		2	4142	6097	219	252	0.052873	0.0413318			613	0.147996		13059	0.317176
		3	4215	6246	235	274	0.0557533	0.0438681			638	0.151364		13087	0.322075
1：50		1	4335	5985	207	226	0.0477509	0.0377611	0.0455508	0.0360819	618	0.142561	0.133978	12852	0.337302
		2	4298	5840	200	217	0.0465333	0.0371575			586	0.136342		12761	0.336807
		3	3682	5281	156	176	0.0423683	0.033327			453	0.123031		12523	0.294019
1:100		1	4833	6648	191	206	0.03952	0.0309868	0.0394536	0.0308189	1065	0.22036	0.226474	13302	0.363329
		2	4742	6613	163	179	0.0343737	0.0270679			1107	0.233446		13298	0.356595
		3	4880	6831	217	235	0.0444672	0.034402			1101	0.225615		13201	0.369669
Protein Concentration (μg/μL)
0.5		1	3852	5974	174	201	0.0451713	0.0336458	0.0421837	0.0314126	602	0.156282	0.145589	13179	0.292283
		2	3345	5612	132	162	0.0394619	0.0288667			451	0.134828		12577	0.265962
		3	3316	5327	139	169	0.041918	0.0317252			483	0.145657		12399	0.267441
0.25		1	2782	5189	124	153	0.0445723	0.0294854	0.0424752	0.0287932	351	0.126168	0.126709	12190	0.22822
		2	2856	5522	128	169	0.0448179	0.0306049			372	0.130252		12830	0.222603
		3	2708	4983	103	131	0.0380355	0.0262894			335	0.123708		12105	0.223709
0.1		1	4236	6266	163	177	0.0384797	0.0282477	0.037798	0.0275707	935	0.220727	0.218911	13234	0.320085
		2	4113	6128	149	162	0.0362266	0.026436			901	0.219062		13131	0.313228
		3	4084	6208	158	174	0.0386876	0.0280284			886	0.216944		13041	0.313166
0.05		1	4742	6369	140	151	0.0295234	0.0237086	0.0304496	0.0245871	1249	0.263391	0.266085	13154	0.360499
		2	4785	6497	150	164	0.031348	0.0252424			1308	0.273354		13222	0.361897
		3	4692	6328	143	157	0.0304774	0.0248104			1227	0.261509		13148	0.35686
Comparison of optimized conditions and Unoptimized conditions
Optimized conditions		1	3880	4683	111	118	0.0286082	0.0251975	0.0278484	0.0241398
		2	3963	4996	109	119	0.0275044	0.0238191
		3	4265	5384	117	126	0.0274326	0.0234027
Unoptimized conditions		1	4082	4748	1100	1226	0.269476	0.258214	0.284156	0.270637
		2	4304	4961	1218	1336	0.282993	0.269301
		3	4150	4768	1245	1356	0.3	0.284396
Enrichment
Optimized conditions		1	2898	4644	345	369	0.119048	0.0794574	0.126887	0.087211
		2	3316	5523	418	497	0.126055	0.0899873
		3	3268	5543	443	511	0.135557	0.0921883
Unoptimized conditions		1	1808	2786	846	1130	0.46792	0.405599	0.467365	0.411492
		2	1709	2613	790	1046	0.462259	0.400306
		3	1816	2562	857	1098	0.471916	0.428571

## Sheet: 补数据
second									2581	3339	127	137	0.0492057	0.0410302	2908.67	4567.33	0.0446317
1-1(2)	3852	5974	174	201	0.0451713	0.0336458	0.0421837	0.0332183	3316	5327	139	169	0.041918	0.0317252
1-2(2)	3345	5612	132	162	0.0394619	0.0288667			2829	5036	121	155	0.0427713	0.0307784
1-3(2)	2829	5036	121	155	0.0427713	0.0307784
1-1	2648	3337	106	111	0.0400302	0.0332634			2829	5036	121	155	0.0427713	0.0307784	0.0432869	0.0320498
1-2	2581	3339	127	137	0.0492057	0.0410302			3316	5327	139	169	0.041918	0.0317252
1-3	3316	5327	139	169	0.041918	0.0317252			3852	5974	174	201	0.0451713	0.0336458
2-1	3054	5352	153	187	0.0500982	0.0349402	0.0464961
2-2	2782	5189	124	153	0.0445723	0.0294854			2782	5189	124	153	0.0445723	0.0294854	2782	5231.33	0.0424752
2-3	2708	4983	103	131	0.0380355	0.0262894			2708	4983	103	131	0.0380355	0.0262894
2-1(2)	2856	5522	128	169	0.0448179	0.0306049			2856	5522	128	169	0.0448179	0.0306049
2-1(2)	2647	5307	117	157	0.044201	0.0295836
2-3(2)	2653	5226	113	150	0.0425933	0.0287026
									2782	5189	124	153	0.0445723	0.0294854	0.0424752	0.0287932
		谱图数差不多							2856	5522	128	169	0.0448179	0.0306049
									2708	4983	103	131	0.0380355	0.0262894
