# Supplementary material for: Controlling nonspecific trypsin cleavages in LC-MS/MS-based shotgun proteomics using optimized experimental conditions
Source: Royal Society of Chemistry journal article supplement (doi:10.1039/c5an01505g), 2015-01-01
Supplement: c5an01505g3.pdf [file c5an01505g3.pdf]

Supplementary figure 1. The percentage of partially tryptic peptides varies greatly in different standard proteins.

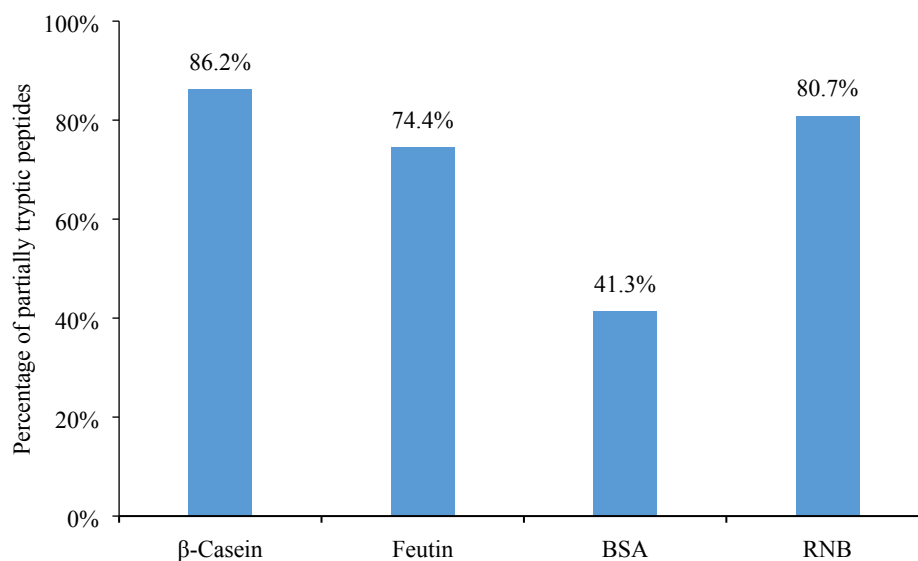

Supplementary figure 2. The partially tryptic cleavage rate, missed cleavages rate and spectrum identification rate under various experimental conditions.

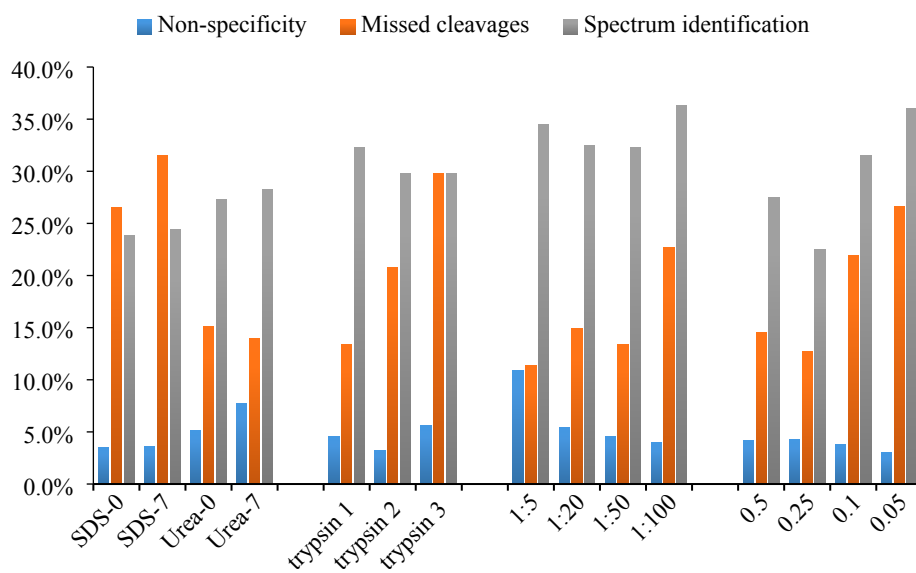

Supplementary figure 3. The concentration distribution of proteins occurring nonspecific trypsin cleavage.

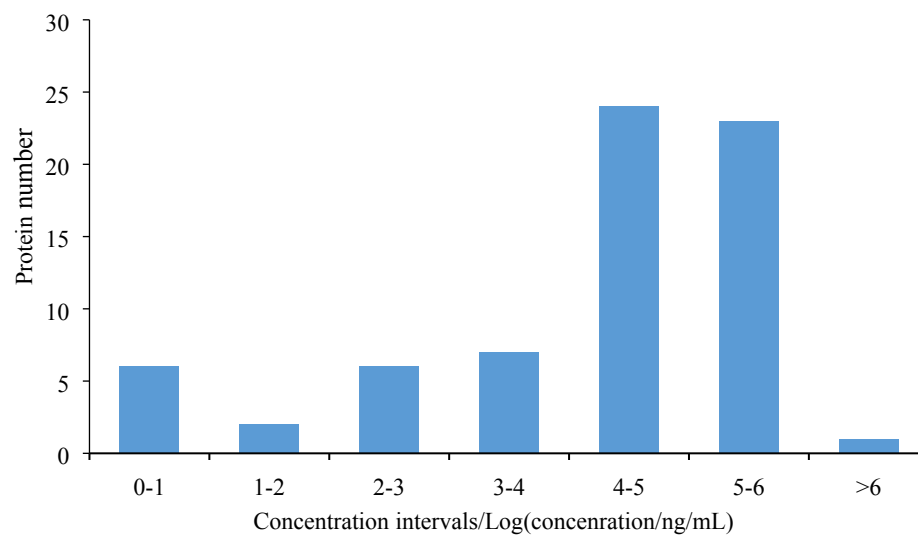

Supplementary table 3. Overview of the Three Commercial Trypsins Compared in This Study

| no. | name                                  | manufacturer | side activity                         | origin  | modification                       | part no. | price (¥)  | ratios           |
|-----|---------------------------------------|--------------|---------------------------------------|---------|------------------------------------|----------|------------|------------------|
| 1   | Sequencing Grade Modified Trypsin     | Promega      | none                                  | porcine | TPCK, <sup>a</sup><br>Dimethylated | V5113    | 344/100µg  | 1:20 to<br>1:100 |
| 2   | Trypsin Gold, Mass spectrometry Grade | Promega      | none                                  | porcine | TPCK, <sup>a</sup><br>Dimethylated | V5280    | 614/100µg  | 1:20 to<br>1:100 |
| 3   | Trypsin                               | Sigma        | chymotrypsin ≤0.1<br>units/mg protein | bovine  | TPCK <sup>a</sup>                  | T1426    | 0.96/100µg | 1:20 to<br>1:100 |

<sup>a</sup>L-1-tosylamido-2-phenylethyl chloromethyl ketone. <sup>b</sup>20 mM Ca<sup>2+</sup> will inhibit auto-digestion.
